# Supplementary material for: Modelling the Characteristic Residues of Chlorophyll f Synthase (ChlF) from Halomicronema Hongdechloris to Determine Its Reaction Mechanism
Source: Preprints.org preprint supplement (doi:10.20944/preprints202308.2051.v1), 2023-08-30
Supplement: Supplementary file 1 [file Table S1.xlsx]

## Sheet: supporting information Table S1
Supplementary Table 1 (Table S1). Genetic information of selected 19 cyanobacteria
Cyanobacteria	Taxonomy (order/family)	Genome Accession	FRL_D1	ChlF	Typical D1	Other D1
Calothrix parasitica NIES-267	Nostocales/ Calotrichaceae	AP018230, AP018232, AP018228, AP018227, AP018229, AP018231	WP_096658606	WP_096658601	WP_096656912	WP_096652347	WP_096661719
Calothrix sp. NIES-3974	Nostocales/ Calotrichaceae	AP018254	WP_096620791	WP_096620792	WP_096621069	WP_096620385	WP_096622687
Calothrix sp. PCC 7507	Nostocales/ Calotrichaceae	CP003943	WP_015126591	WP_144051279	WP_015126955	WP_015126756
Chlorogloeopsis fritschii PCC 6912	Nostocales/ Chlorogloeopsidaceae	AJLN00000000	WP_016873419	WP_016873418	WP_016872293	WP_016873445	WP_016878157	WP_016873890
Chroococcidiopsis thermalis PCC 7203	Chroococcidiopsidales/ Chroococcidiopsidaceae	CP003598, CP003597, CP003599	WP_015153112	WP_015153111	WP_015156271	WP_015153219.1	WP_015152761.1
Fischerella muscicola PCC 7414	Nostocales/ Hapalosiphonaceae	AJLK00000000	WP_016868705.1	WP_016868706.1	WP_016865688.1	WP_016869984.1	WP_016869652.1
Fischerella sp. NIES-4106	Nostocales/ Hapalosiphonaceae	AP018299, AP018303, AP018298, AP018300, AP018304, AP018302, AP018301, AP018306, AP018305	WP_096680231.1	WP_096680229.1	WP_044451282.1	WP_096678265.1	WP_096674540.1	WP_096674567.1		WP_096673441		WP_096673919
Fischerella sp. PCC 9605	Nostocales/ Hapalosiphonaceae	ALVT00000000	WP_009453703.1	WP_026734723.1	WP_026731460.1	WP_026731594.1	WP_026732648.1	WP_026734420		WP_026735004		WP_026735543
Fischerella thermalis PCC 7521	Nostocales/ Hapalosiphonaceae	AJLL00000000	WP_009453703.1	WP_016871858.1	WP_026086318.1	WP_009455234.1	WP_009454952.1	WP_009453755.1
Halomicronema hongdechloris	Pseudanabaenales/ Prochlorotrichaceae	CP021983	WP_080806377.1	WP_225889441.1	WP_080811069.1	WP_080809685.1	WP_088430586.1
Mastigocoleus testarum BC008	Nostocales/ Hapalosiphonaceae	LMTZ00000000	WP_027845866.1	WP_082650693.1	WP_058183748.1	WP_058184047.1
Nodosilinea sp. LEGE 07298	Pseudanabaenales/ Prochlorotrichaceae	JADEXE00000000	WP_194026005.1	WP_194025222.1	WP_194024352.1	WP_194021835.1	WP_194025804.1	WP_194024352		WP_194024975		WP_194022111
Nodosilinea sp. P-1105	Pseudanabaenales/ Prochlorotrichaceae	SMDQ00000000	WP_169614310.1	WP_169614324.1	WP_169614908.1	WP_169613460.1	WP_169612317.1
Oscillatoriales sp. JSC-12/Leptolyngbyaceae cyanobacterium JSC-12	Pseudanabaenales/ Leptolyngbyaceae	AJUB00000000, CM001633	EKQ66832.1	EKQ66838.1	EKQ70156.1	EKQ70849.1	EKQ69419.1
*Plectonema cf. radiosum LEGE 06105	Oscillatoriales/ Oscillatoriaceae	JADEWL00000000	WP_193923206.1	WP_193923211.1
Pleurocapsa sp. PCC 7327	Pleurocapsales/ Hyellaceae	CP003590	WP_041393053.1	WP_015143534.1	WP_015141941.1	WP_015142843.1	WP_015143513	WP_015144465
Pleurocapsales cyanobacterium LEGE 10410	Pleurocapsales	JADEXJ00000000	MBE9046806	MBE9046805	MBE9044013	MBE9045307	MBE9045742
Romeria aff. gracilis LEGE 07310	Pseudanabaenales/ Romeriaceae	JADEXG00000000	WP_193909273	WP_193909305	WP_193904418	WP_193912584
Synechococcus sp. PCC 7335	Synechococcales/ Synechococcaceae	ABRV00000000	WP_038016158	WP_006456314	WP_006453575	WP_006458236
* excluded in current report due to incompleted genomic sequences (only FaRLiP cluster information,no other D1 paralogs)
